# Supplementary material for: Theoretical research on a coke-resistant catalyst for the partial oxidation of methane: Pt/Cu single-atom alloys
Source: Royal Society of Chemistry journal article supplement (doi:10.1039/c9nj04723a), 2020-01-01
Supplement: c9nj04723a1.pdf [file c9nj04723a1.pdf]

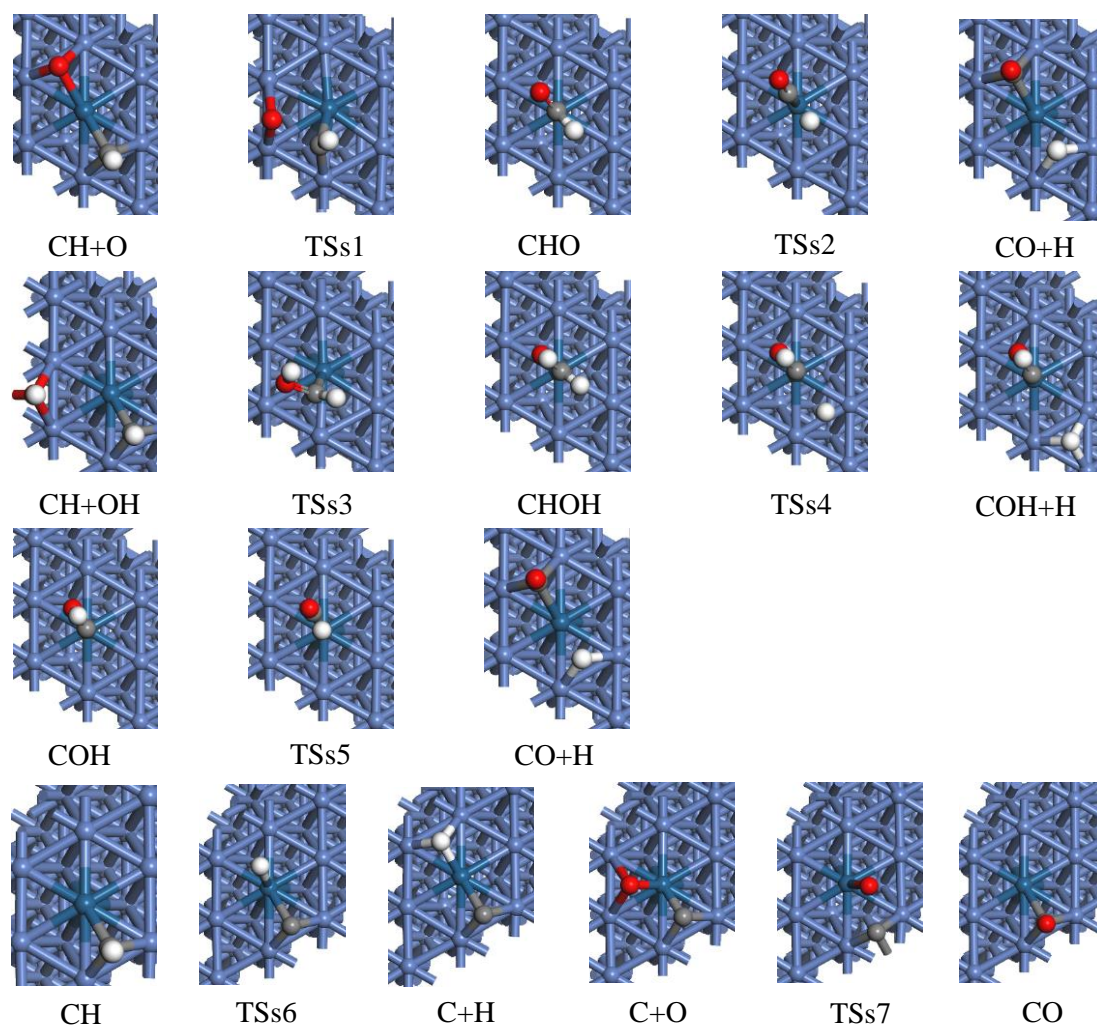

Figure S1 The stable adsorption configurations and transition states in the three reactions of CO formation on the  $Pt_1Ni(111)$  surface.

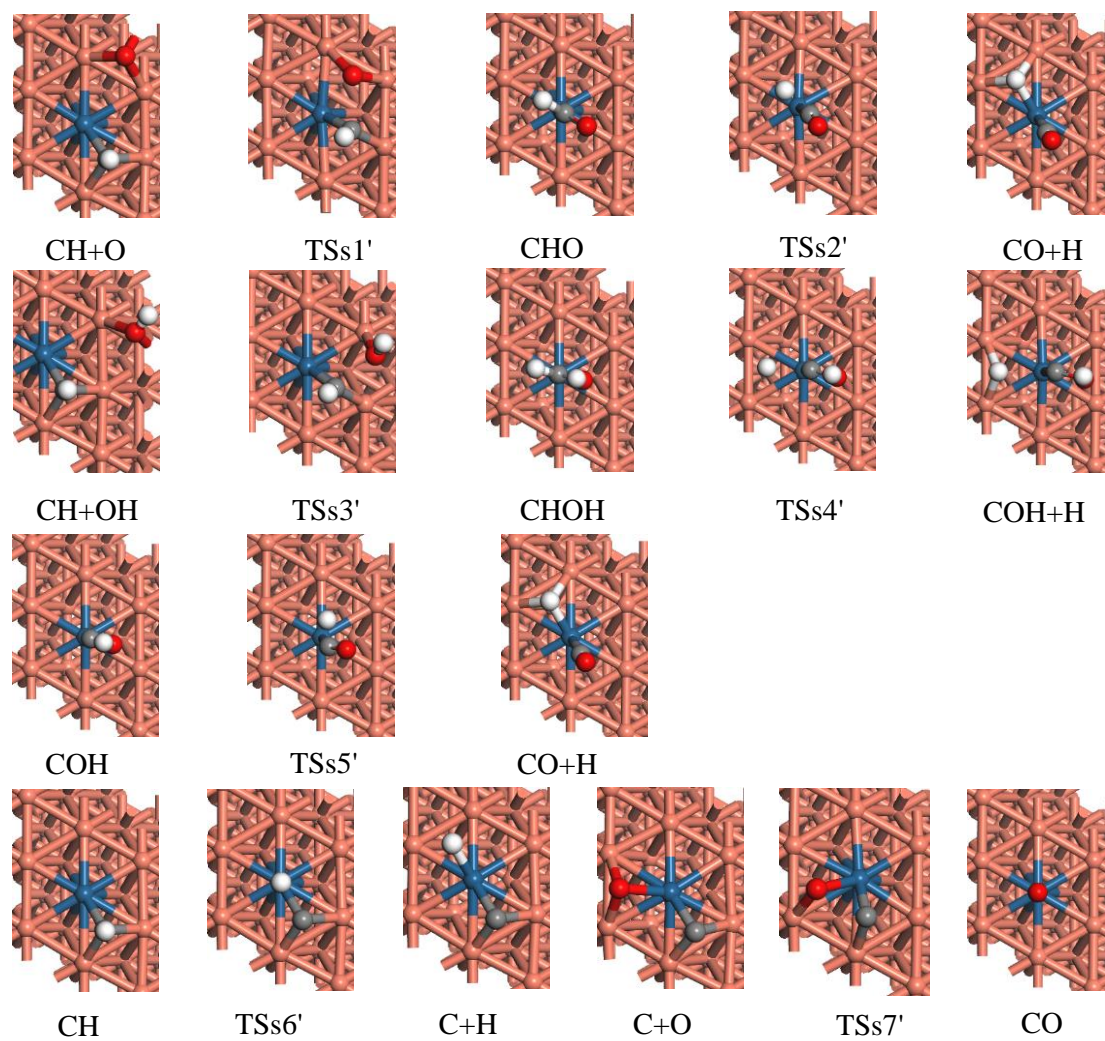

Figure s2 The stable adsorption configurations and transition states in the three reactions of CO formation on the  $Pt_1Cu(111)$  surface.

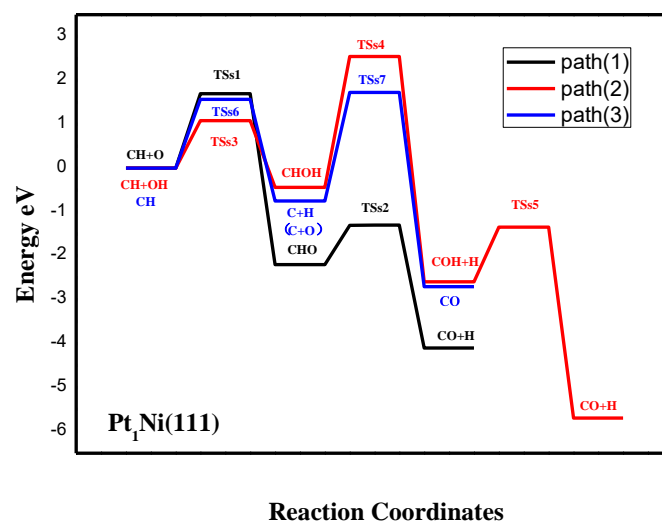

Figure s3 Three reaction energy change curve of *CO formation* on Pt<sub>1</sub>Ni(111) surface.

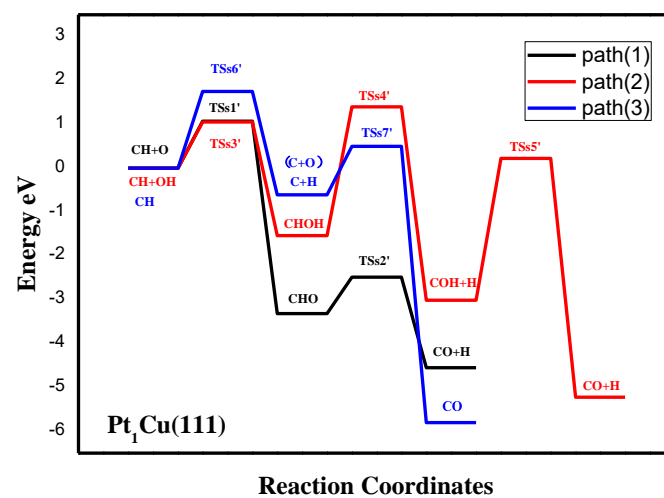

Figure s4 Three reaction energy change curve of *CO* formation on Pt<sub>1</sub>Cu(111) surface.

**Table s1** Energies of three reactions of CO formation on the Pt<sub>1</sub>Ni(111) and Pt<sub>1</sub>Cu(111), and surfaces (eV).

|            | Pt <sub>1</sub> Ni(111) |        | Pt <sub>1</sub> Cu(111) |        |
|------------|-------------------------|--------|-------------------------|--------|
|            | Ea(eV)                  | Ef(eV) | Ea(eV)                  | Ef(eV) |
| CH+O→CHO   | 1.71                    | -2.21  | 1.07                    | -3.32  |
| CHO→CO+H   | 0.90                    | -1.90  | 0.83                    | -1.24  |
| CH+OH→CHOH | 1.08                    | -0.44  | 1.05                    | -1.54  |
| CHOH→COH+H | 2.98                    | -2.15  | 2.94                    | -1.48  |
| COH→CO+H   | 0.81                    | -3.55  | 1.70                    | -3.75  |
| CH→C+H     | 1.57                    | -0.75  | 1.75                    | -0.61  |
| C+O→CO     | 2.47                    | -1.96  | 1.10                    | -5.20  |
